# Supplementary material for: Identifying genetic modifiers of age-associated penetrance in X-linked dystonia-parkinsonism
Source: PubMed Central journal article supplement (PMC8163740; doi:10.1038/s41467-021-23491-4), 2021-05-28
Supplement: 41467_2021_23491_MOESM1_ESM.pdf [file 41467_2021_23491_MOESM1_ESM.pdf]

Supplementary Table 1. Individuals investigated in the present study

|                                                                                                                 |         |
|-----------------------------------------------------------------------------------------------------------------|---------|
| Total number of initially genotyped samples from male XDP patients                                              | 458     |
| Excluded due to a low genotyping quality                                                                        | 8       |
| Excluded due to relatedness to the included individuals                                                         | 97      |
| Patients included in the GWAS analysis                                                                          | 353     |
| Previously reported patients out of those included in GWAS <sup>1-4</sup>                                       | 332/353 |
| Patients in whom association of AAO and the hexanucleotide repeat number was previously reported <sup>3,4</sup> | 328/353 |
| Patients in whom <i>MSH3</i> exon 1 was sequenced out of those included in GWAS                                 | 285/353 |
| Additional patients (not included in GWAS) in whom <i>MSH3</i> exon 1 was sequenced                             | 95      |
| Healthy Filipino controls without the SVA retrotransposon insertion                                             | 162     |

XDP - X-linked dystonia-parkinsonism; GWAS – genome-wide association study; AAO – age at onset; SVA - SINE-VNTR-Alu

Supplementary Table 2. Loci harboring single-nucleotide polymorphisms (SNPs) with genome-wide significance. Source data are provided as a Source Data file.

| Chromosome | Region                             | Position            | Number of SNPs | Number of exonic SNPs |
|------------|------------------------------------|---------------------|----------------|-----------------------|
| 5          | Intergenic, 3' from <i>DHFR</i>    | 79893519 - 79920073 | 8              | n/a                   |
|            | <i>DHFR</i>                        | 79928518 - 79947431 | 4              | 0                     |
|            | <i>MSH3</i>                        | 79950781 - 80171134 | 34             | 1                     |
|            | Intergenic, 3' from <i>MSH3</i>    | 80181147 - 80222980 | 14             | n/a                   |
| 7          | <i>EIF2AK1</i>                     | 6064799 - 6098861   | 16             | 0                     |
|            | <i>ANKRD61, EIF2AK1</i>            | 6071007 - 6076017   | 4              | 2 ( <i>ANKRD61</i> )  |
|            | Intergenic, 5' from <i>EIF2AK1</i> | 6098861 - 6106731   | 13             | n/a                   |

Supplementary Table 3. Variants identified in the X-linked dystonia-parkinsonism (XDP) patient cohort and their frequencies (in XDP patients, Filipino controls, and the Genome Aggregation Database (gnomAD) populations<sup>5</sup> (overall, East Asian, and South Asian) and impact on age at onset (AAO) adjusted for the hexanucleotide repeat number (using linear regression model; source data: provided as a Source Data file and [https://gnomad.broadinstitute.org/gene/ENSG00000113318?dataset=gnomad\\_r2\\_1](https://gnomad.broadinstitute.org/gene/ENSG00000113318?dataset=gnomad_r2_1))

| Chromosome | Position GRCh37 | rsID        | Reference           | Alternate  | Consequence - cDNA level       | Consequence - protein level | Variant type                |
|------------|-----------------|-------------|---------------------|------------|--------------------------------|-----------------------------|-----------------------------|
| 5          | 79950490        | rs555608568 | C                   | T          | c.-57C>T                       | n.a.                        | 5' UTR variant              |
| 5          | 79950497        | rs2250063   | C                   | T          | c.-50C>T                       | n.a.                        | 5' UTR variant              |
| 5          | 79950508        | rs1105525   | C                   | T          | c.-39C>T                       | n.a.                        | 5' UTR variant              |
| 5          | 79950512        | rs1105524   | A                   | G          | c.-35A>G                       | n.a.                        | 5' UTR variant              |
| 5          | 79950567        | rs6151597   | G                   | A          | c.21G>A                        | p.Ala7Ala                   | synonymous                  |
| 5          | 79950699        | rs755000466 | TGCAGCGGCTGCAGCGGCC | T          | c.162_179delTGCAGCGGCCGCAGCGGC | p.Ala57_Ala62del            | inframe deletion            |
| 5          | 79950708        | rs2405875   | T                   | C          | c.162T>C                       | p.Ala54Ala                  | synonymous                  |
| 5          | 79950724        | rs2001675   | G                   | GCCGCAGCGC | c.181_189dupGCAGCGCCC          | p.Ala61_Pro63dup            | inframe duplicat.           |
| 5          | 79950736        | rs2405877   | C                   | G          | c.190C>G                       | p.Pro64Ala                  | missense                    |
| 5          | 79950741        | rs761734241 | GCCCCAGCT           | G          | c.199_207delCCAGCTCCC          | p.Pro67_Pro69del            | inframe deletion            |
| 5          | 79950781        | rs1650697   | A                   | G          | c.235A>G                       | p.Ile79Val                  | missense                    |
| 5          | 80047076        | rs245013    | A                   | C          | n.a.                           | n.a.                        | intron 12 variant           |
| 5          | 80171134        | rs33003     | A                   | G          | n.a.                           | n.a.                        | intron 23 variant           |
| 7          | 6070528         | rs62456190  | C                   | T          | n.a.                           | n.a.                        | intron 11 variant (EIF2AK1) |

| XDP patients     |                  | Filipino controls (no XDP haplotype) |                  | gnomAD allele overall |                  | gnomAD East Asian |                  | gnomAD South Asian |                  | AAO adjusted for the hexanucleotide repeat number  |          |
|------------------|------------------|--------------------------------------|------------------|-----------------------|------------------|-------------------|------------------|--------------------|------------------|----------------------------------------------------|----------|
| Allele frequency | Homozygote count | Allele frequency                     | Homozygote count | Allele frequency      | Homozygote count | Allele frequency  | Homozygote count | Allele frequency   | Homozygote count | Effect ( $\beta$ ) $\pm$ standard error (in years) | p-value  |
| 0.0368           | 3/380            | 0.0340                               | 0/162            | 0.0003                | 0                | 0.0043            | 0                | 0.0000             | 0                | +0.29 $\pm$ 1.02                                   | 0.780612 |
| 0.0855           | 2/380            | 0.1142                               | 6/162            | 0.2456                | 7002             | 0.0402            | 17               | 0.3380             | 1570             | +3.06 $\pm$ 0.75                                   | 0.000048 |
| 0.0632           | 3/380            | 0.0586                               | 1/162            | 0.1542                | 3233             | 0.0673            | 32               | 0.2386             | 838              | -3.78 $\pm$ 0.81                                   | 0.000005 |
| 0.4908           | 88/380           | 0.4475                               | 31/162           | 0.6465                | 49613            | 0.3612            | 924              | 0.7608             | 8016             | -1.69 $\pm$ 0.42                                   | 0.000064 |
| 0.0053           | 0/380            | 0.0031                               | 0/162            | 0.0076                | 10               | 0.0002            | 0                | 0.0164             | 6                | n.a.                                               | n.a.     |
| 0.1145           | 2/380            | 0.1759                               | 6/162            | 0.2485                | 7702             | 0.0522            | 27               | 0.3404             | 1671             | +2.15 $\pm$ 0.68                                   | 0.001673 |
| 0.0066           | 0/380            | 0.0031                               | 1/162            | 0.0067                | 7                | 0.0011            | 0                | 0.0124             | 4                | n.a.                                               | n.a.     |
| 0.3434           | 38/380           | 0.2747                               | 9/162            | 0.0531                | 367              | 0.0886            | 85               | 0.0440             | 40               | -1.86 $\pm$ 0.45                                   | 0.000046 |
| 0.0039           | 0/380            | 0.0031                               | 0/162            | 0.0169                | 9                | 0.0151            | 1                | 0.0174             | 0                | n.a.                                               | n.a.     |
| 0.1145           | 2/380            | 0.1759                               | 6/162            | 0.2965                | 8405             | 0.0613            | 40               | 0.3911             | 1827             | +2.15 $\pm$ 0.68                                   | 0.001673 |
| 0.5987           | 133/380          | 0.6111                               | 54/162           | 0.8382                | 39707            | 0.7815            | 1669             | 0.8358             | 4972             | +2.76 $\pm$ 0.41                                   | 0.000000 |
| 0.4412           | 124/376          | 0.3905                               | 58/162           | 0.3550                | 2120             | 0.4141            | 138              | 0                  | 0                | -3.11 $\pm$ 0.44                                   | 0.000000 |
| 0.3964           | 165/376          | 0.4645                               | 71/162           | 0.6094                | 5267             | 0.6316            | 295              | 0                  | 0                | -3.23 $\pm$ 0.44                                   | 0.000000 |
| 0.1652           | 251/376          | 0.1563                               | 105/162          | 0.3576                | 2235             | 0.3784            | 116              | 0                  | 0                | 3.86 $\pm$ 0.58                                    | 0.000000 |

n.a. - not applicable

Supplementary Table 4. *MSH3* exon 1 region haplotypes observed in X-linked dystonia-parkinsonism (XDP) patients and their association with ages at disease onset, using haplotype-based score statistics in 380 XDP patients. Source data are provided as a Source Data file.

| Haplotype | rs555608568<br>c.-57C>T | rs2250063<br>c.-50C>T | rs1105525<br>c.-39C>T | rs1105524<br>c.-35A>G | Length<br>polymorphism type | rs1650697<br>p.Ile79Val<br>c.235A>G | Frequency | Hap-<br>score | p-value | Effect ( $\beta$ ) $\pm$<br>standard error<br>(in years) | Haplotype<br>counts |
|-----------|-------------------------|-----------------------|-----------------------|-----------------------|-----------------------------|-------------------------------------|-----------|---------------|---------|----------------------------------------------------------|---------------------|
| H1        | C                       | C                     | C                     | A                     | 6a                          | G                                   | 0.481     | 4.030         | 0.00006 | +1.70 $\pm$ 0.41                                         | 362                 |
| H2        | C                       | C                     | C                     | G                     | 7a                          | A                                   | 0.290     | -4.063        | 0.00005 | -1.94 $\pm$ 0.47                                         | 224                 |
| H3        | C                       | T                     | C                     | G                     | 3a                          | G                                   | 0.083     | 4.174         | 0.00003 | +3.21 $\pm$ 0.75                                         | 63                  |
| H4        | C                       | C                     | T                     | G                     | 6a                          | A                                   | 0.059     | -4.281        | 0.00002 | -3.70 $\pm$ 0.84                                         | 45                  |
| H5        | T                       | C                     | C                     | G                     | 7a                          | A                                   | 0.037     | 0.279         | 0.78020 | +0.29 $\pm$ 1.02                                         | 28                  |
| H6        | C                       | C                     | C                     | A                     | 3a                          | G                                   | 0.024     | -0.375        | 0.70799 | -0.57 $\pm$ 1.53                                         | 22                  |

Supplementary Table 5. Expression quantitative trait loci (eQTL) query of the lead single-nucleotide polymorphisms (SNPs) from our study using the BrainSeq dataset<sup>6</sup> from the eQTL Catalogue<sup>7</sup> Source data: <https://www.ebi.ac.uk/eqtl/Studies/>, <https://www.gtexportal.org/home/gene/MSH3>, <https://www.gtexportal.org/home/gene/PMS2>

| Variant    | Allele count | Alternative alleles | Effect ( $\beta$ ) $\pm$ standard<br>error | p-value     | Effect direction in GTEx |
|------------|--------------|---------------------|--------------------------------------------|-------------|--------------------------|
| rs245013   | 958          | 282                 | 0.0145 $\pm$ 0.0145                        | 0.3187      | same                     |
| rs33003    | 958          | 411                 | 0.0060 $\pm$ 0.0138                        | 0.6636      | not found in GTEx        |
| rs1650697  | 958          | 148                 | -0.0331 $\pm$ 0.0184                       | 0.0716      | same                     |
| rs62456190 | not assayed  | not assayed         | not assayed                                | not assayed | not assayed              |

GTEx - The Genotype-Tissue Expression (GTEx) Portal<sup>8</sup>

Supplementary Table 6. Expression analyses in blood of 40 X-linked dystonia-parkinsonism (XDP) patients using linear regression model. Source data are provided as a Source Data file and <https://www.gtexportal.org/home/gene/MSH3>, <https://www.gtexportal.org/home/gene/PMS2>.

A. Correlation of the lead SNPs on chromosome 5 and *MSH3* exon 1 polymorphisms with *MSH3* expression

| Variant   | Allele count | Alternative alleles | Effect ( $\beta$ ) $\pm$ standard error | p-value | Effect direction in GTEx |
|-----------|--------------|---------------------|-----------------------------------------|---------|--------------------------|
| rs245013  | 80           | 46                  | 0.2084 $\pm$ 0.0966                     | 0.0374  | same                     |
| rs33003   | 80           | 58                  | -0.0212 $\pm$ 0.0860                    | 0.8060  | not found in GTEx        |
| rs1650697 | 80           | 36                  | -0.2274 $\pm$ 0.0906                    | 0.0164  | same                     |
| 3a        | 80           | 6                   | -0.0168 $\pm$ 0.1596                    | 0.7373  | not applicable           |
| 6a        | 80           | 32                  | -0.0920 $\pm$ 0.0715                    | 0.1130  | not applicable           |
| 7a        | 80           | 18                  | 0.0512 $\pm$ 0.0774                     | 0.0410  | not applicable           |

SNP - single-nucleotide polymorphisms; GTEx - The Genotype-Tissue Expression Portal<sup>8</sup>

B. Correlation of the lead SNP on chromosome 7 with *PMS2* expression

| Variant    | Allele count | Alternative alleles | Effect ( $\beta$ ) $\pm$ standard error | $p$ -value | Effect direction in GTEx |
|------------|--------------|---------------------|-----------------------------------------|------------|--------------------------|
| rs62456190 | 80           | 12                  | 0.01382 $\pm$ 0.1899                    | 0.9420     | same                     |

SNP - single-nucleotide polymorphisms; GTEx - The Genotype-Tissue Expression Portal<sup>8</sup>

Supplementary Table 7. Primers and PCR conditions

| PCR product      | Primers                           | Reaction                                                                                                                                                                                                                                                                                                                                                                                 | Cycling conditions                                                                                                                            |
|------------------|-----------------------------------|------------------------------------------------------------------------------------------------------------------------------------------------------------------------------------------------------------------------------------------------------------------------------------------------------------------------------------------------------------------------------------------|-----------------------------------------------------------------------------------------------------------------------------------------------|
| Repeat analysis* | 5'-[FAM]AGCAGTACAGTCCAGCTTTGGC-3' | 2.5µl DNA 50ng/µl<br>5.5µl HPLC water<br>1.0µl PCR buffer<br>0.2µl 10xdNTPs<br>0.3µl Primer 1 (10µM)<br>0.3µl Primer 2 (10µM)<br>0.1µl PrimeSTAR GXL<br>(Takara Bio, Cat. #R050B)                                                                                                                                                                                                        | 94°C 2 min.;<br>30x (98°C 10 sec.,<br>64°C 35 sec.);<br>72°C 7 min.                                                                           |
|                  | 5'-CTCAAGCCTTATTACAATGCCAGT-3'    |                                                                                                                                                                                                                                                                                                                                                                                          |                                                                                                                                               |
| MSH3 exon 1      | 5'-GGCAGGTCCCCGTTCTTGC-3'         | 1.0µl DNA 50ng/µl<br>4.5µl HPLC water<br>2.0µl GC-rich PCR reaction<br>buffer, with 7.5mM MgCl <sub>2</sub> and<br>DMSO 5x concentrated<br>0.2µl 10xdNTPs<br>0.4µl Primer 1 (10µM)<br>0.4µl Primer 2 (10µM)<br>0.1µl GC-rich Enzyme Mix<br>0.4µl MgCl <sub>2</sub> Stock solution<br>25mM<br>1.0µl GC-rich resolution<br>solution 5M<br>(Roche GC-rich PCR System,<br>Cat. #12140306001) | 95°C 3 min.;<br>10x (95°C 30 sec.,<br>63°C 30 sec.,<br>72°C 30 sec.), 25x<br>(95°C 30 sec.,<br>63°C 30 sec.,<br>72°C 45 sec.);<br>72°C 7 min. |
|                  | 5'-CCCCTTCCTCCTCCAGCCC-3'         |                                                                                                                                                                                                                                                                                                                                                                                          |                                                                                                                                               |
| MSH3 cDNA ex12 F | 5'-GCTGTGGGTTTTAGACCAC-3'         | 1.0µl cDNA<br>3.4µl HPLC water<br>0.3µl Primer 1 (10µM)<br>0.3µl Primer 2 (10µM)<br>5.0µl SYBR Green Mix<br>(thermoscientific, Cat. #K0241,<br>Maxima SYBR Green/<br>Fluorescein qPCR Master Mix)                                                                                                                                                                                        | 95°C 3 min.;<br>45x (95°C 15 sec.,<br>60°C 15 sec.,<br>72°C 30 sec.)                                                                          |
| MSH3 cDNA ex14 R | 5'-GGTATTATTGCTTGAAATTCTGAC-3'    |                                                                                                                                                                                                                                                                                                                                                                                          |                                                                                                                                               |
| PMS2-LC-ex6F     | 5'-TGGAAGCCCCAGCATAAAGG-3'        |                                                                                                                                                                                                                                                                                                                                                                                          |                                                                                                                                               |
| PMS2-LC-ex7R     | 5'-ATCGGAACAGCTCAAACCGT-3'        |                                                                                                                                                                                                                                                                                                                                                                                          |                                                                                                                                               |
| GAPDH fwd Ex1    | 5'-GTCAGCCGCATCTTCTTTTG-3'        |                                                                                                                                                                                                                                                                                                                                                                                          |                                                                                                                                               |
| GAPDH rev Ex3    | 5'-GCGCCCAATACGACCAAATC-3'        |                                                                                                                                                                                                                                                                                                                                                                                          |                                                                                                                                               |
| YWHAZ LC F       | 5'-GTAGGTCATCTTGGAGGGTCCG-3'      |                                                                                                                                                                                                                                                                                                                                                                                          |                                                                                                                                               |
| YWHAZ LC R       | 5'-GCTATGCTTGTTGTGACTGATCG-3'     |                                                                                                                                                                                                                                                                                                                                                                                          |                                                                                                                                               |

\*Primers and conditions from <sup>3</sup>.

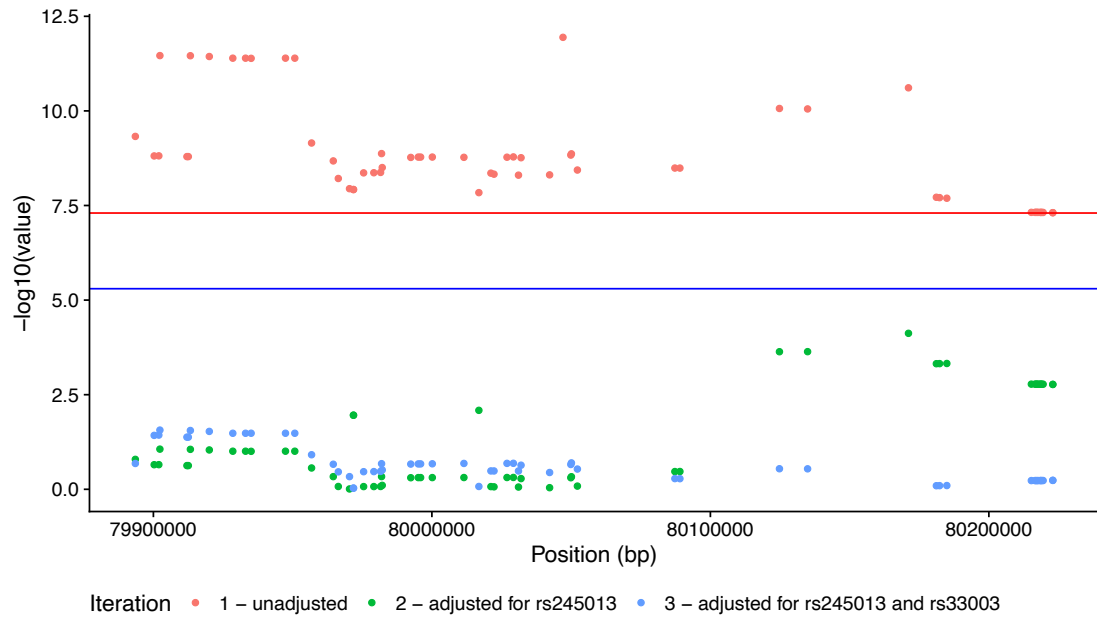

Supplementary Figure 1. Fine mapping of the chromosome 5 candidate region. To determine whether one or several single-nucleotide polymorphism (SNPs) are responsible for the chromosome 5 signal, we iteratively recalculated the regression coefficients of all SNPs per region adjusted for the SNP with the lowest  $p$ -value in this region. Iteration 1 (red) shows the unadjusted  $p$ -values, while the  $p$ -values were adjusted for rs374288546 in iteration 2 (green) where six SNPs still have  $p$ -values below  $5 \times 10^{-4}$ . Last Iteration 3 (blue) shows  $p$ -values adjusted for rs374288546 and rs245378 where no other SNP remains significant. Genomic coordinates are given according to GRCh37. Source data are provided as a Source Data file.

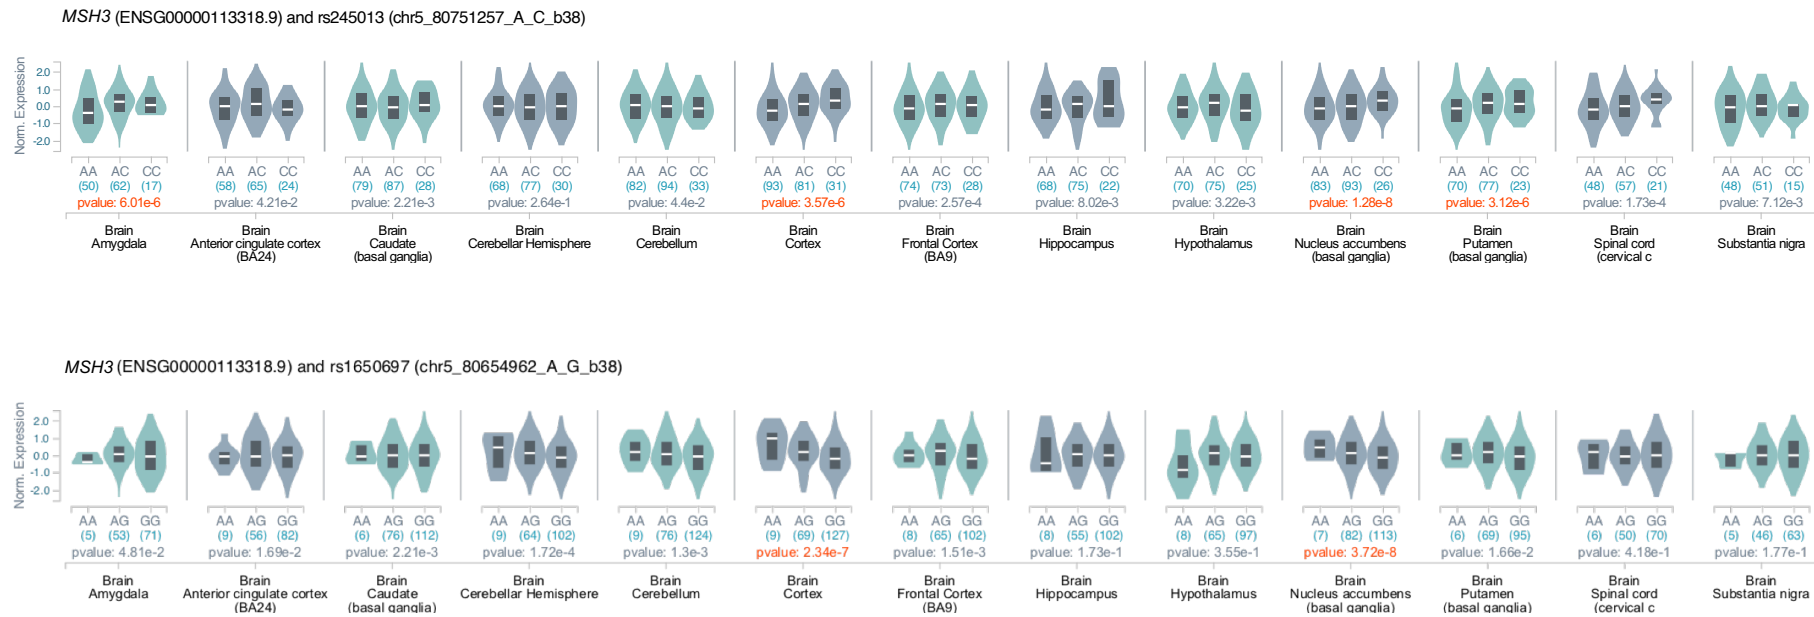

Supplementary Figure 2. Expression quantitative trait locus (eQTL) in rs245013 (upper plots) rs1650697 (lower plots) in brain tissue. The GTEx Portal was queried for tissue-specific association of gene expression with the rs245013 and rs1650697 variants revealing significant eQTLs (red). Source data: <https://www.gtexportal.org/home/gene/MSH3>.

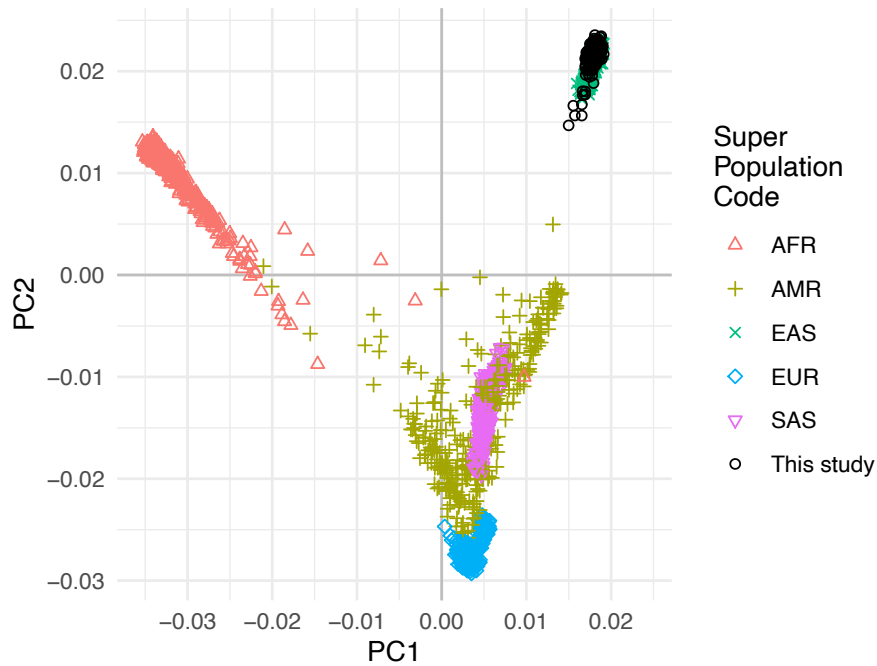

Supplementary Figure 3. Population stratification of our genome-wide association study (GWAS) patient visualized by Principal Component (PC) Analysis plot. All 353 patients clustered together with East Asian (EAS) super population samples in PCA based on shared variants with 1000 Genomes Phase 3 reference haplotypes. AFR: African; AMR: Admixed American; EUR: European; SAS; South Asian. Source data are provided as a Source Data file.

#### Supplementary References

1. Makino, S. *et al.* Reduced neuron-specific expression of the TAF1 gene is associated with X-linked dystonia-parkinsonism. *Am. J. Hum. Genet.* **80**, 393–406 (2007).
2. Domingo, A. *et al.* New insights into the genetics of X-linked dystonia-parkinsonism (XDP, DYT3). *Eur. J. Hum. Genet.* **23**, 1334–40 (2015).
3. Bragg, D. C. *et al.* Disease onset in X-linked dystonia-parkinsonism correlates with expansion of a hexameric repeat within an SVA retrotransposon in TAF1. *Proc. Natl. Acad. Sci. U. S. A.* **114**, E11020–E11028 (2017).
4. Westenberger, A. *et al.* A hexanucleotide repeat modifies expressivity of X-linked dystonia parkinsonism. *Ann. Neurol.* ana.25488 (2019) doi:10.1002/ana.25488.
5. Karczewski, K. J. *et al.* Variation across 141,456 human exomes and genomes reveals the spectrum of loss-of-function intolerance across human protein-coding genes. *bioRxiv* 531210 (2019) doi:10.1101/531210.
6. Jaffe, A. E. *et al.* Developmental and genetic regulation of the human cortex transcriptome illuminate schizophrenia pathogenesis. *Nat. Neurosci.* **21**, 1117–1125 (2018).
7. Kerimov, N. *et al.* eQTL catalogue: A compendium of uniformly processed human gene expression and splicing QTLs. *bioRxiv* 2020.01.29.924266 (2020) doi:10.1101/2020.01.29.924266.
8. The Genotype-Tissue Expression (GTEx) Project; <https://gtexportal.org/>; 11/30/20.
